# Supplementary material for: Assessing the Effect of Sequencing Depth and Sample Size in Population Genetics Inferences
Source: PubMed Central journal article supplement (PMC3832539; doi:10.1371/journal.pone.0079667), 2013-11-18
Supplement: pone.0079667.s017.pdf [file pone.0079667.s017.pdf]

**Table S1 - Power to detect outliers in the distribution of nucleotide diversity**

Accuracy of detecting outliers in the distribution of nucleotide diversity. Simulations were performed as described in Figure 1. The number of top and bottom (5 or 10 out of 100) windows from the distribution of  $H$  calculated from known genotypes that were correctly identified using sequencing data. Wilcoxon-test correlation between  $H$  and  $\hat{H}$  (see Methods) is also shown.

| Sequencing depth | Sample size | Bottom 5 | Top 5 | Bottom 10 | Top 10 | Correlation |
|------------------|-------------|----------|-------|-----------|--------|-------------|
| 1X               | 1,000       | 5        | 5     | 10        | 9      | 0.815       |
| 2X               | 500         | 5        | 5     | 10        | 8      | 0.958       |
| 10X              | 100         | 5        | 4     | 10        | 10     | 0.810       |
| 50X              | 20          | 3        | 5     | 7         | 9      | 0.277       |
