# Supplementary material for: Assessing the Effect of Sequencing Depth and Sample Size in Population Genetics Inferences
Source: PubMed Central journal article supplement (PMC3832539; doi:10.1371/journal.pone.0079667), 2013-11-18
Supplement: pone.0079667.s018.pdf [file pone.0079667.s018.pdf]

### Table S2 - SNP calling Precision and Recall with data filtering

Precision and Recall values for detecting polymorphic sites at different scenarios of sequencing depth and sample size. Analyses were performed as described in Table 1. Sites with a total sequencing depth below the 10<sup>th</sup> percentile were discarded.

| Sequencing depth | Sample size | Precision      | Recall         |
|------------------|-------------|----------------|----------------|
| 1X               | 1,000       | 0.737(0.0466)  | 0.749 (0.0491) |
| 2X               | 500         | 0.776 (0.0465) | 0.773 (0.0473) |
| 10X              | 100         | 0.776 (0.0482) | 0.723 (0.0447) |
| 50X              | 20          | 1 (0)          | 0.538 (0.0626) |
